# Supplementary material
Source: PubMed Central journal article supplement (PMC3416384)

A phylogenetic tree inferred from a whole genome alignment of a test set of 40 *E. coli* genomes. The tree was inferred with RAxML with 100 bootstrap replicates. Colored blocks indicate *E. coli* phylogroups.

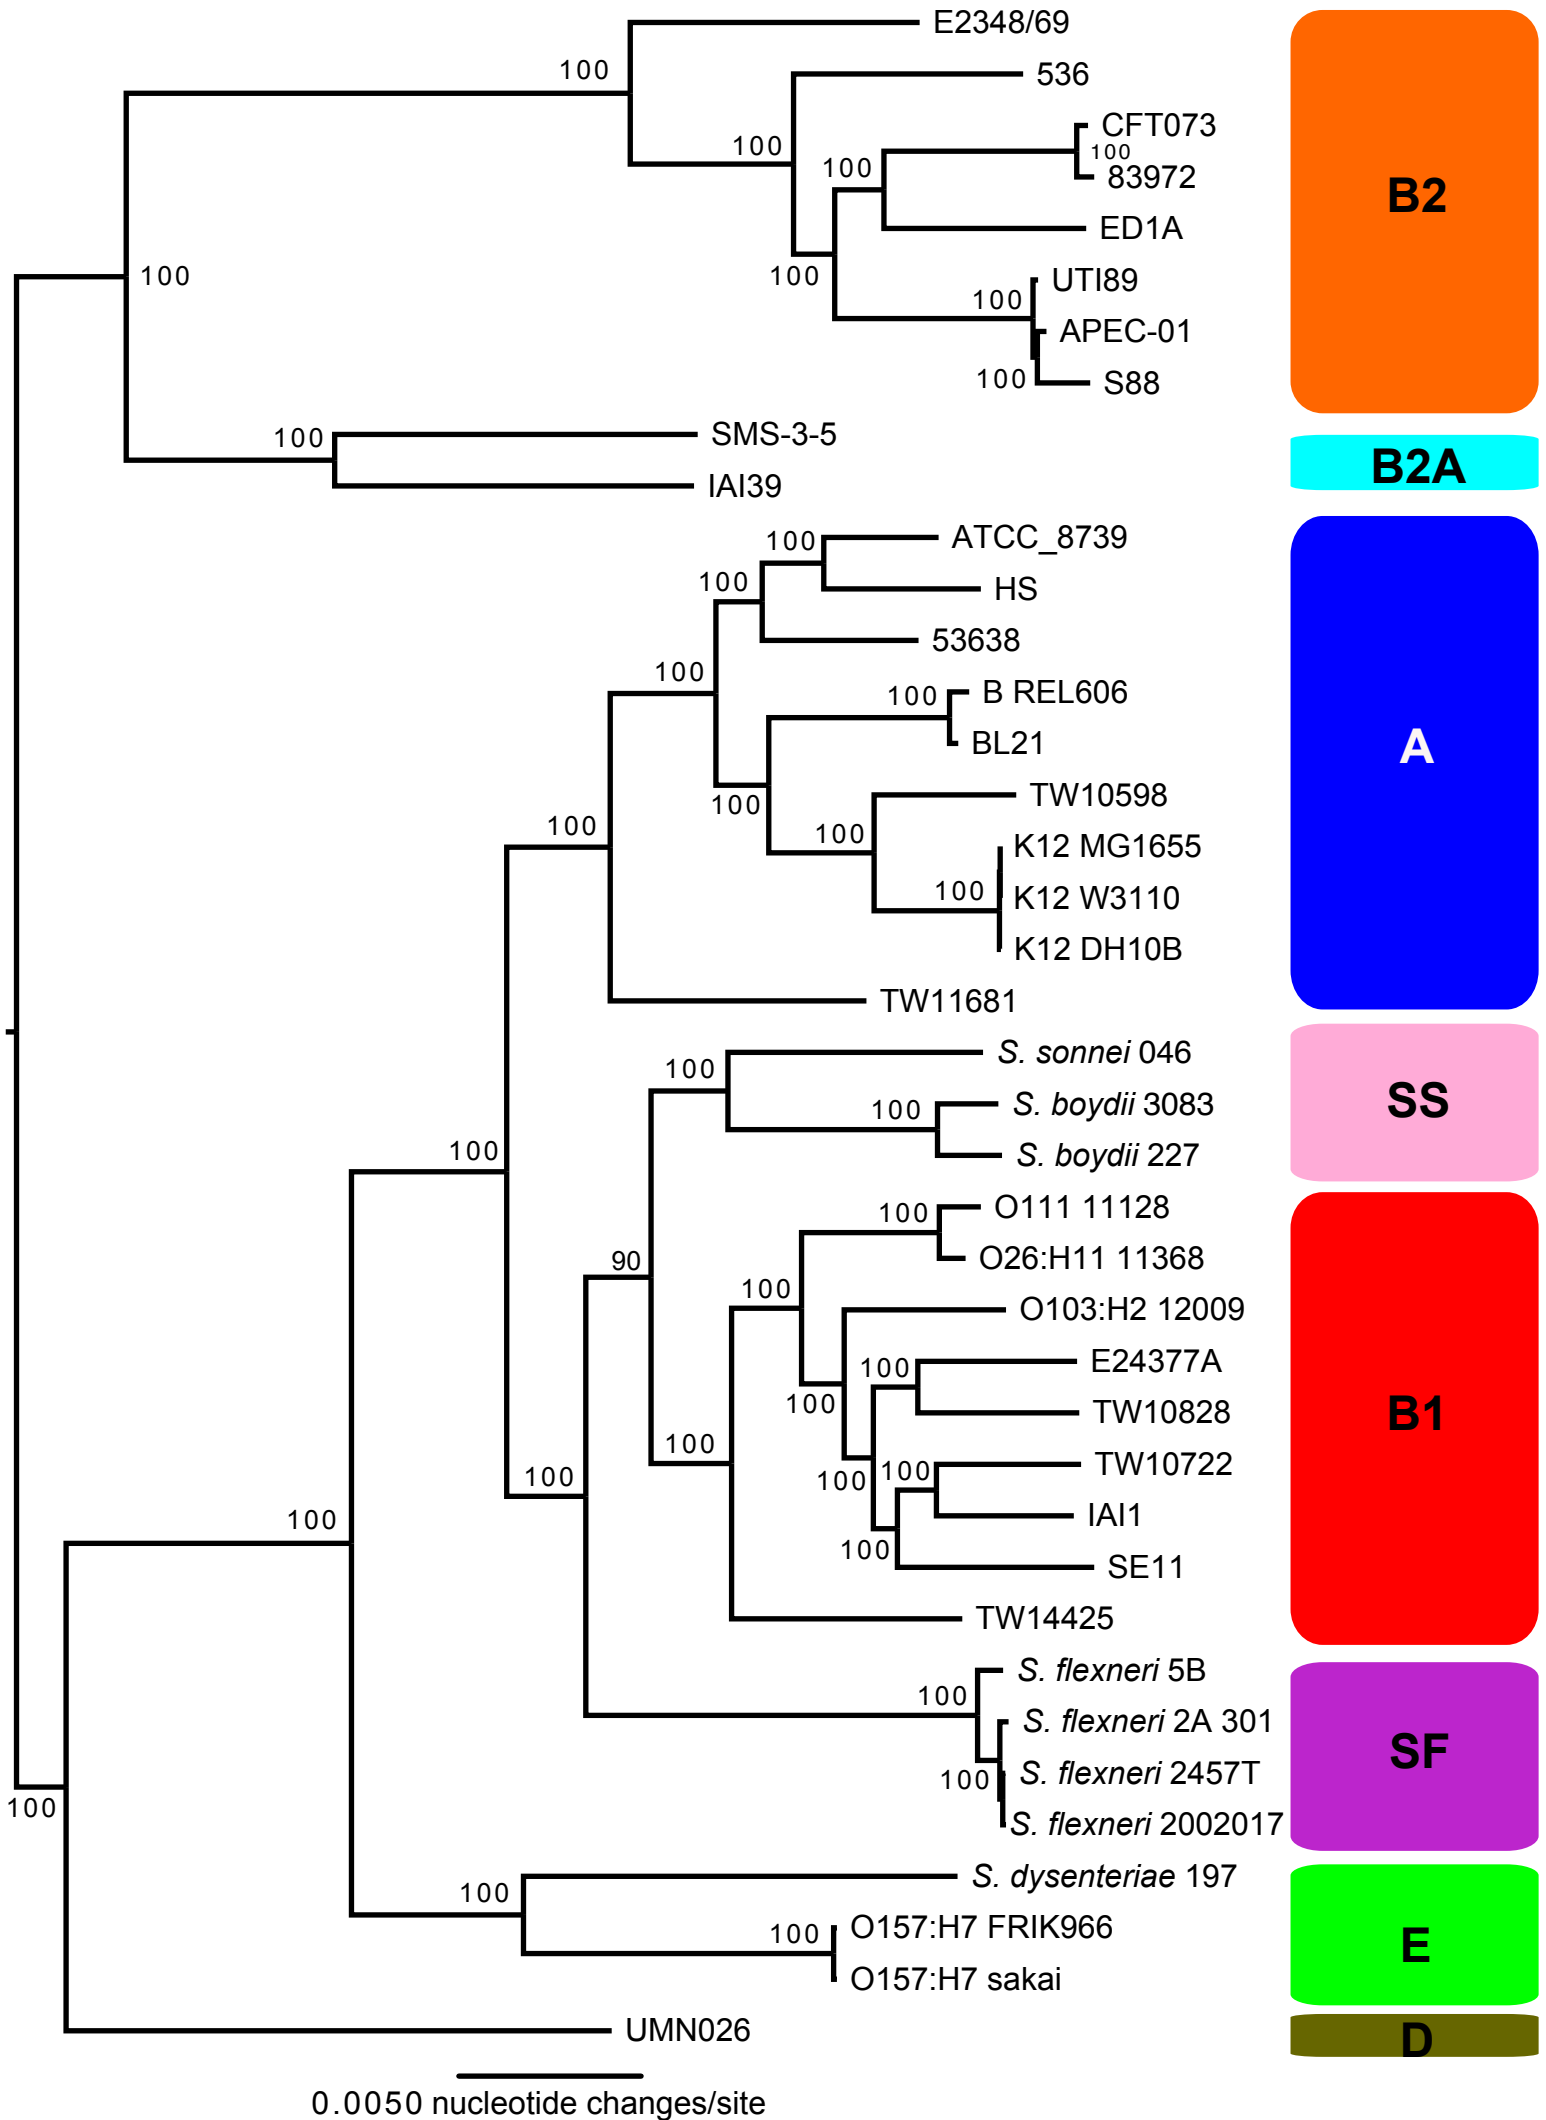

Supplement: supp_78.14.4884_AEM00929-12_FigS1.pdf [file supp_78.14.4884_AEM00929-12_FigS1.pdf]
