# Supplementary material
Source: PubMed Central journal article supplement (PMC3416384)

Supplemental Figure 2. Comparison of fragment size and RF value. A plot of all RF values obtained by runs of Phylomark using a sequence length of 500-900 nucleotides. The number of fragments with the same RF value were summed with custom scripts and plotted.

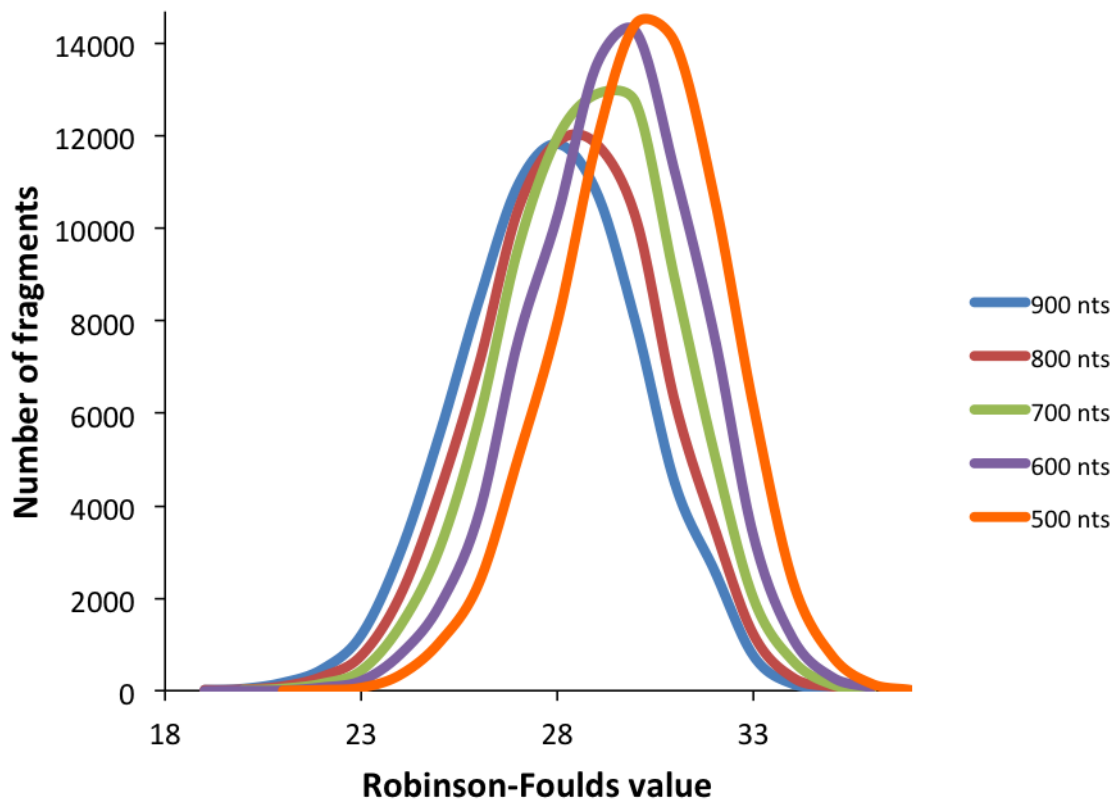

Supplement: supp_78.14.4884_AEM00929-12_FigS2.pdf [file supp_78.14.4884_AEM00929-12_FigS2.pdf]
