# Supplementary material
Source: PubMed Central journal article supplement (PMC3416384)

Phylogenetic trees inferred by using molecular markers from either the GIG-EM 3-marker system, or the 4-marker system. Classic *E. coli* phylogroups are shown in the legend. The results show that using 3 markers does not adversely affect the tree topology. Classifications of phylogroups were performed using the whole genome phylogeny.

## GIG-EM-3

## GIG-EM-4

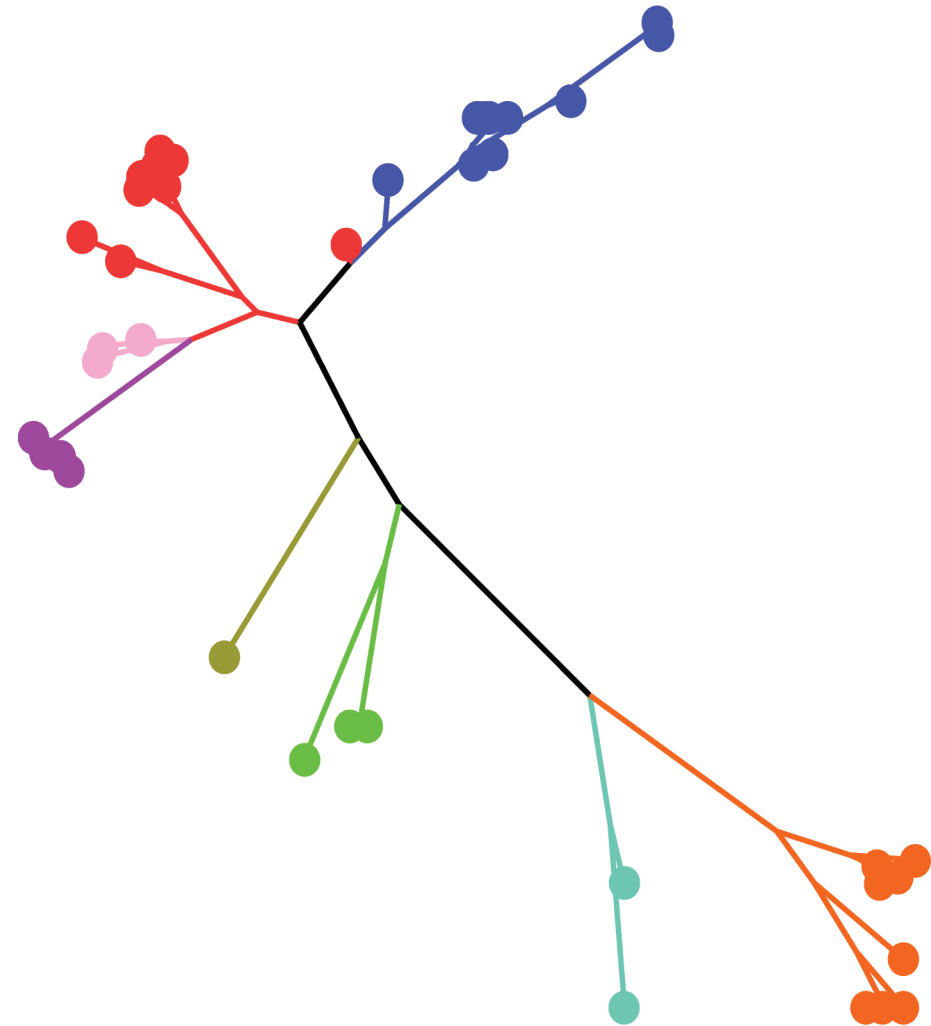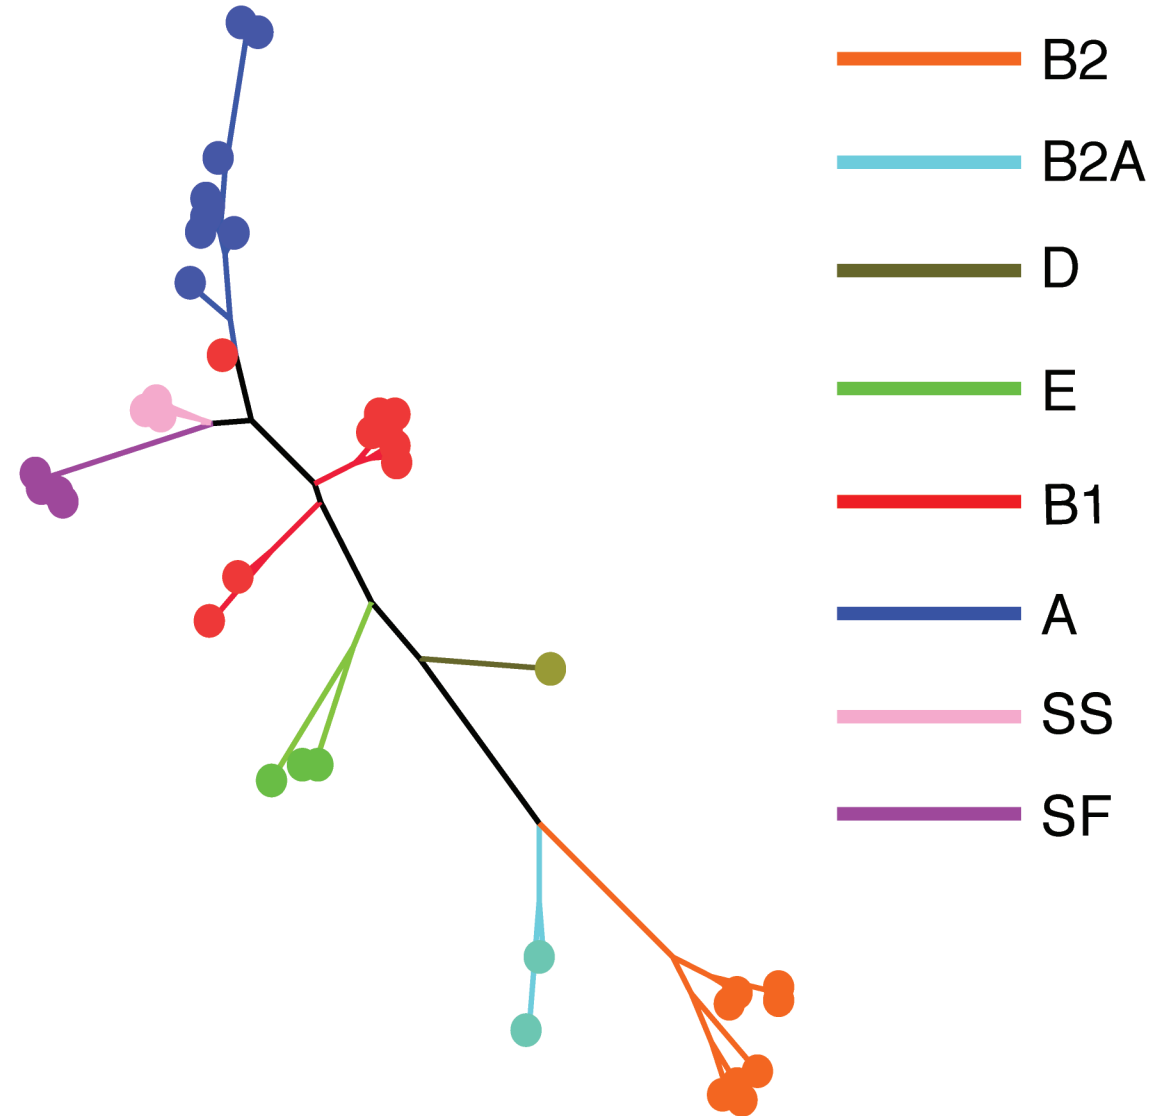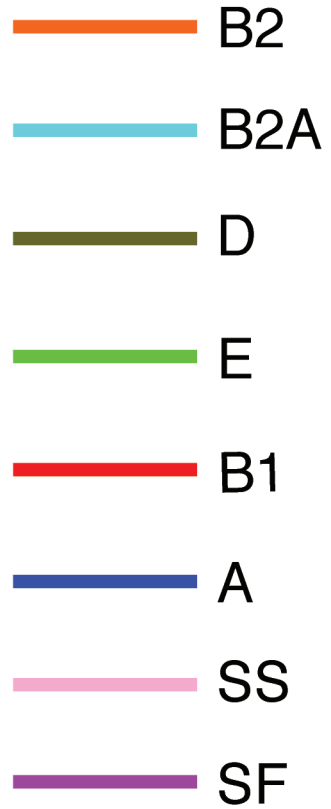

Supplement: supp_78.14.4884_AEM00929-12_FigS4.pdf [file supp_78.14.4884_AEM00929-12_FigS4.pdf]
