# Supplementary material
Source: PubMed Central journal article supplement (PMC3416384)

Comparison of WGA, pubMLST and GIG-EM phylogenies using the DECA genomes as a test genome collection. Phylogenetic trees inferred from 78 genomes in the DECA collection. Trees were inferred from concatenated alignments from a whole genome alignment (WGA), the GIG-EM 3-gene system, or the pubMLST 7-gene system. Branches are colored to show clade membership, but are not associated with an established phylotype. Each genome was assigned to a branch based on its location in the WGA phylogeny. Each tree was inferred with a maximum likelihood algorithm in RAxML.

WGA

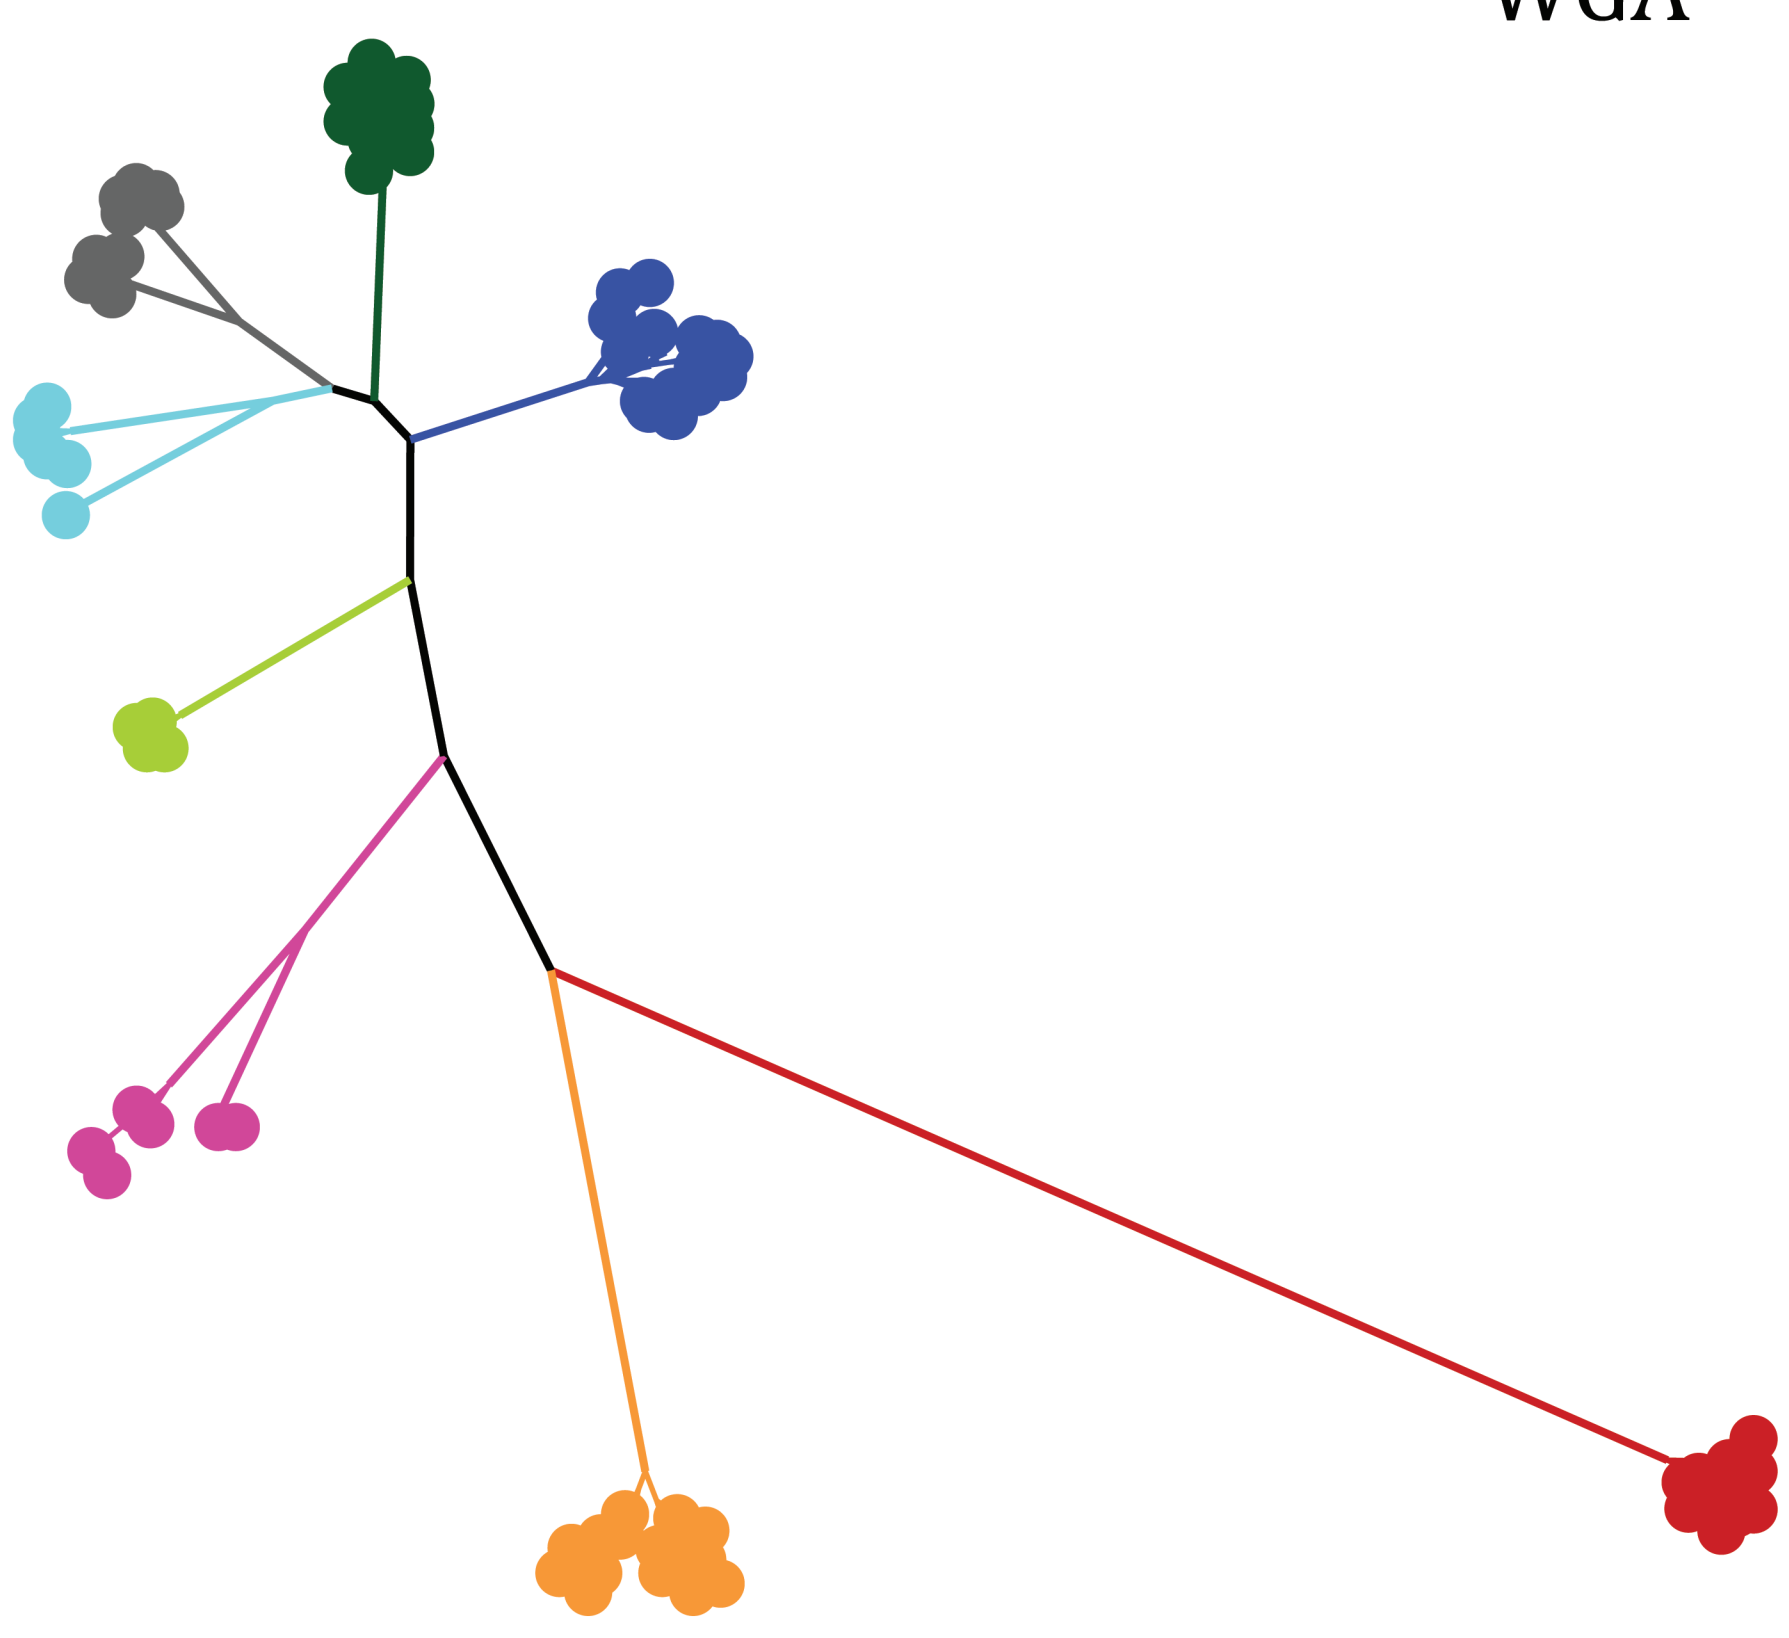

GIG-EM

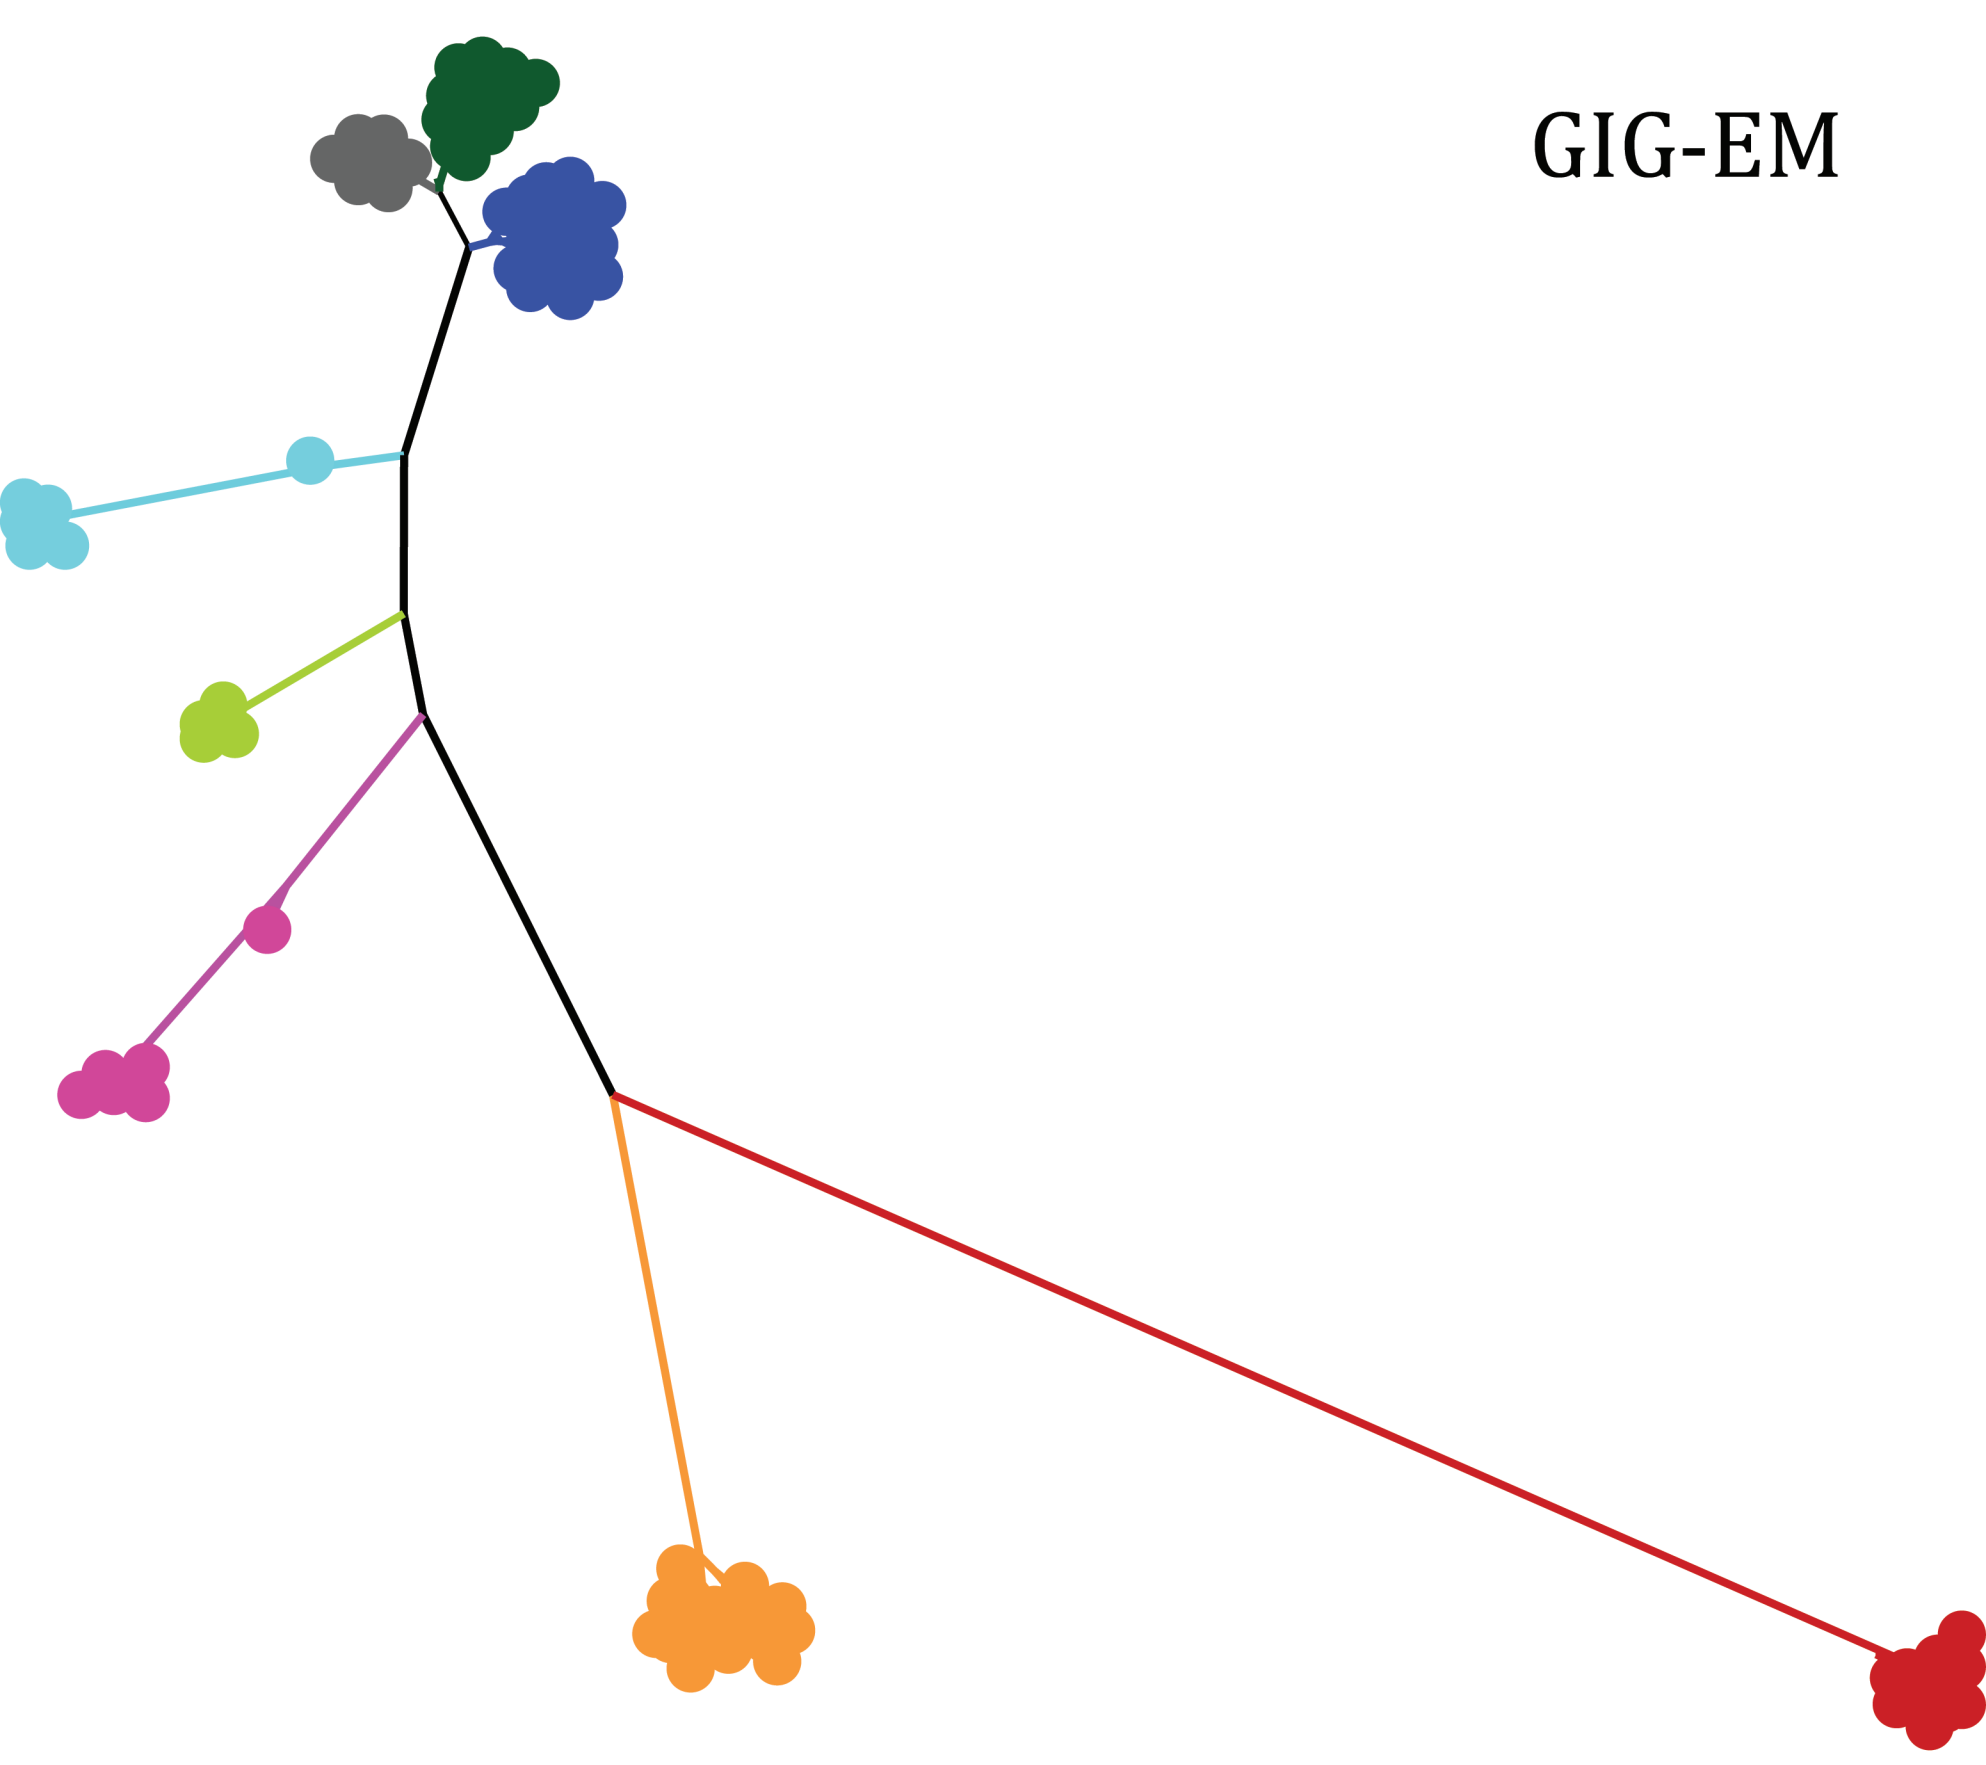

pubMLST

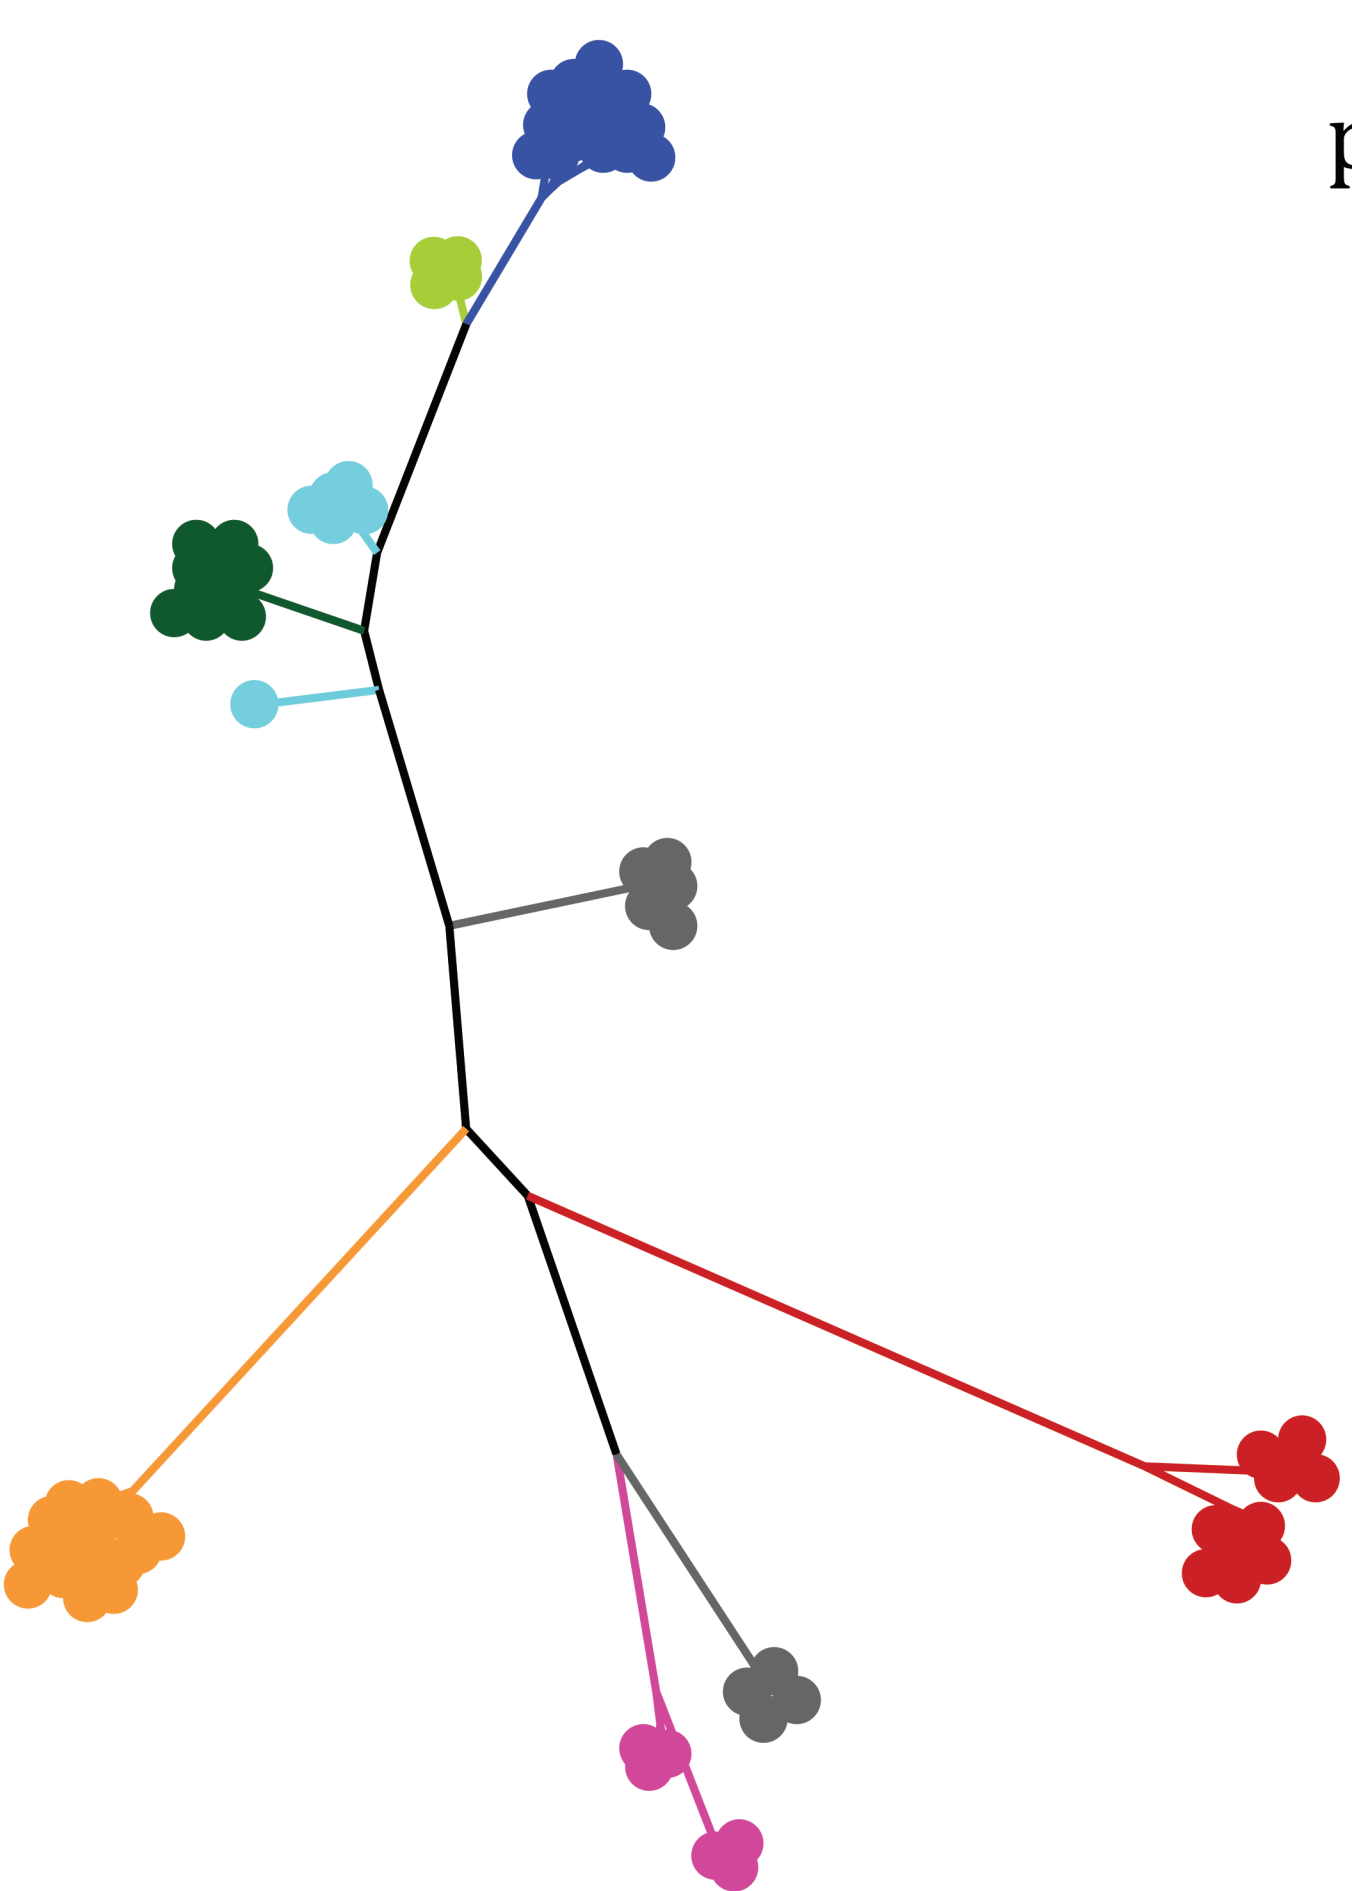

Supplement: supp_78.14.4884_AEM00929-12_FigS5.pdf [file supp_78.14.4884_AEM00929-12_FigS5.pdf]
