# Supplementary material
Source: PubMed Central journal article supplement (PMC3416384)

A plot of the number of genomic fragments against Robinson-Foulds values in a set of 40 *E. coli* genomes and a 20-genome sub-set. The letters describe the annotation of each genomic fragment tested; either the associated gene name or Genbank locus id are shown.

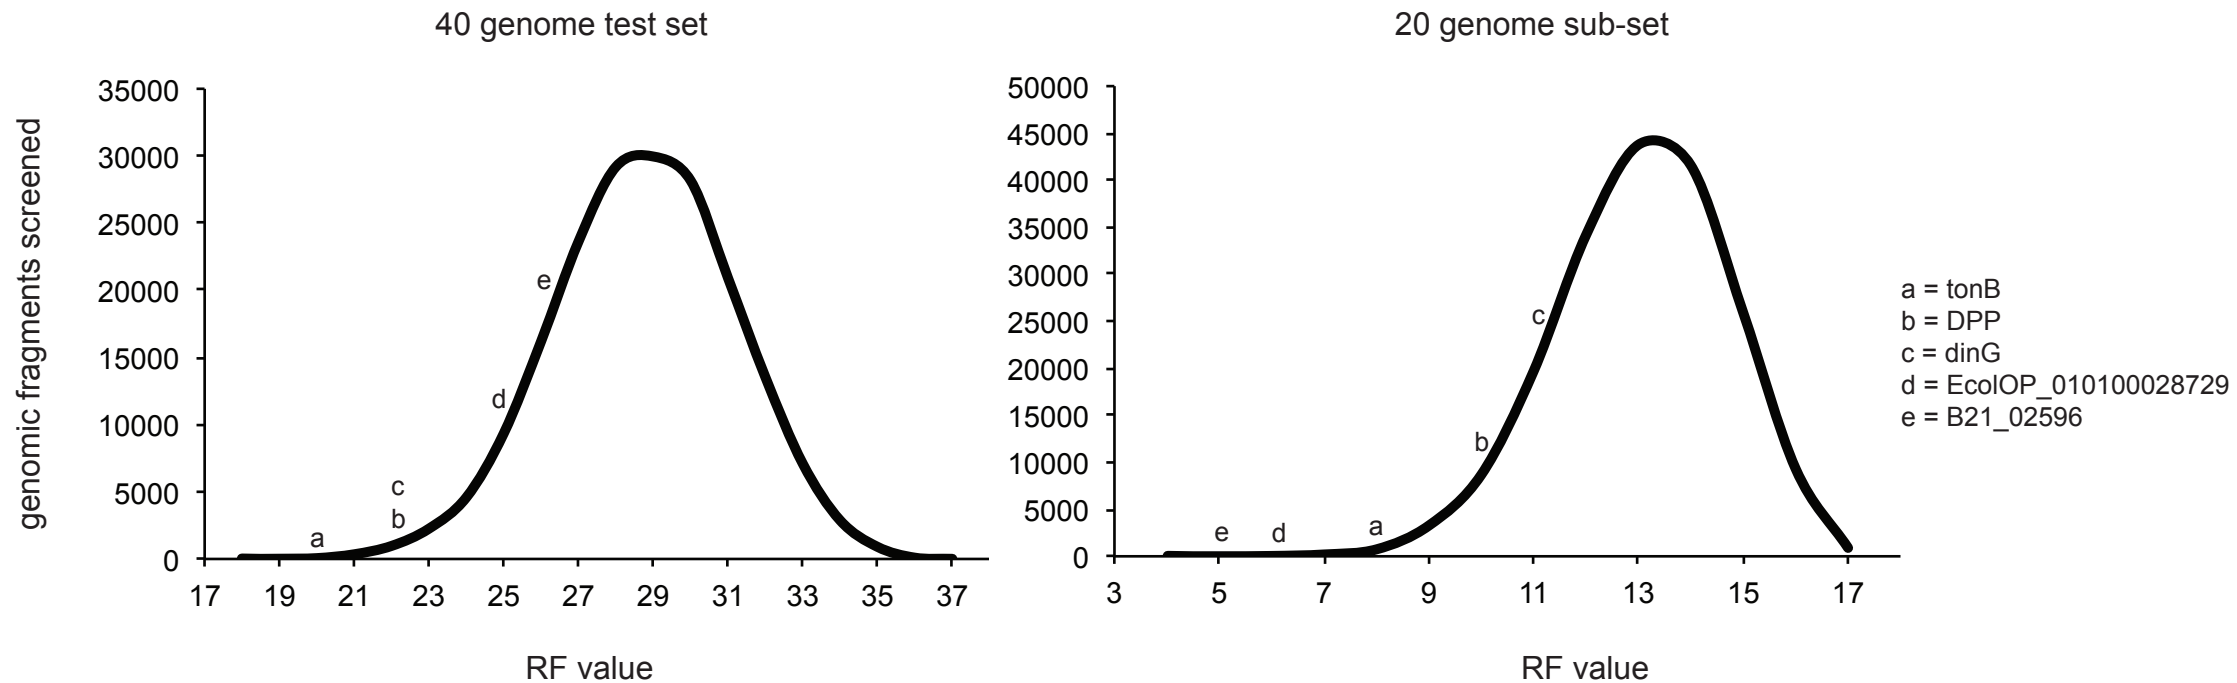

Supplement: supp_78.14.4884_AEM00929-12_FigS7.pdf [file supp_78.14.4884_AEM00929-12_FigS7.pdf]
