# Supplementary material
Source: PubMed Central journal article supplement (PMC3416384)
Supplement: supp_78.14.4884_AEM00929-12_TableS1.pdf [file supp_78.14.4884_AEM00929-12_TableS1.pdf]

**Table S1.** Accession details of *E. coli* / *A. baumannii* genomes used in this study

| Genome                                  | Accession       | 20 genome sub-set |
|-----------------------------------------|-----------------|-------------------|
| <i>E. coli</i> SMS-3-5                  | NC_010498       | X                 |
| <i>E. coli</i> B str. REL606            | NC_012967       | X                 |
| <i>E. coli</i> SE11                     | NC_011415       | X                 |
| <i>E. coli</i> APEC 01                  | NC_008563       |                   |
| <i>E. coli</i> UTI89                    | NC_007946       | X                 |
| <i>E. coli</i> O157:H7 str. Sakai       | NC_002695       |                   |
| <i>E. coli</i> 536                      | NC_008253       |                   |
| <i>E. coli</i> HS                       | NC_009800       |                   |
| <i>E. coli</i> str. K-12 substr. DH10B  | NC_010473       |                   |
| <i>E. coli</i> CFT073                   | NC_004431       | X                 |
| <i>E. coli</i> O111:H- str. 11128       | NC_013364       |                   |
| <i>E. coli</i> O103:H2 str. 12009       | NC_013353       |                   |
| <i>E. coli</i> UMN026                   | NC_011751       | X                 |
| <i>E. coli</i> IAI39                    | NC_011750       | X                 |
| <i>E. coli</i> ED1a                     | NC_011745       | X                 |
| <i>E. coli</i> O26:H11 str. 11368       | NC_011361       |                   |
| <i>E. coli</i> BL21                     | NC_012947       | X                 |
| <i>E. coli</i> S88                      | NC_011742       | X                 |
| <i>E. coli</i> IAI1                     | NC_011741       |                   |
| <i>E. coli</i> O127:H6 str. E2348/69    | NC_011601       |                   |
| <i>E. coli</i> ATCC 8739                | NC_010468       |                   |
| <i>E. coli</i> str. K-12 substr. MG1655 | NC_000913       | X                 |
| <i>E. coli</i> O157:H7 str. FRIK966     | NZ_ACXN00000000 | X                 |
| <i>E. coli</i> 53638                    | NZ_AAKB00000000 |                   |
| <i>E. coli</i> 83972                    | NZ_ACGN00000000 |                   |
| <i>E. coli</i> str. K-12 substr. W3110  | AC_000091       |                   |
| <i>E. coli</i> E24377A                  | NC_009801       | X                 |
| <i>S. sonnei</i> Ss046                  | NC_007384       |                   |
| <i>S. boydii</i> Sb227                  | NC_007613       | X                 |
| <i>S. boydii</i> CDC 3083-94            | NC_010658       | X                 |
| <i>S. flexneri</i> 5 str. 8401          | NC_008258       |                   |
| <i>S. flexneri</i> 2a str. 301          | NC_004337       | X                 |
| <i>S. flexneri</i> 2002017              | CP001383        |                   |
| <i>S. flexneri</i> 2a str. 2457T        | NC_004741       | X                 |
| <i>S. dysenteriae</i> Sd197             | NC_007606       | X                 |
| <i>E. coli</i> TW10598                  | AELA00000000    | X                 |
| <i>E. coli</i> TW10722                  | AELB01000000    |                   |
| <i>E. coli</i> TW10828                  | AELC01000000    | X                 |
| <i>E. coli</i> TW11681                  | AELD01000000    |                   |
| <i>E. coli</i> TW14425                  | AELE01000000    |                   |
| <i>A. baumannii</i> AB0057              | NC_011586.1     |                   |
| <i>A. baumannii</i> AB056               | NZ_ADGZ00000000 |                   |
| <i>A. baumannii</i> AB058               | NZ_ADHA00000000 |                   |
| <i>A. baumannii</i> AB059               | NZ_ADHB00000000 |                   |
| <i>A. baumannii</i> AB_1656_2           | CP001921.1      |                   |
| <i>A. baumannii</i> AB210               | AEOX00000000    |                   |
| <i>A. baumannii</i> AB307_0294          | NC_011595.1     |                   |
| <i>A. baumannii</i> AB_3909             | AEOZ00000000    |                   |
| <i>A. baumannii</i> AB_3990             | AEOY00000000    |                   |
| <i>A. baumannii</i> AB_4190             | AEPA00000000    |                   |
| <i>A. baumannii</i> AB_4857             | AHAG00000000    |                   |
| <i>A. baumannii</i> AB_5075             | AHAH00000000    |                   |
| <i>A. baumannii</i> AB_5256             | AHAI00000000    |                   |
| <i>A. baumannii</i> AB_5711             | AHAJ00000000    |                   |
| <i>A. baumannii</i> AB6013113           | NZ_ACYR00000000 |                   |
| <i>A. baumannii</i> AB6013150           | NZ_ACYQ00000000 |                   |
| <i>A. baumannii</i> AB6014059           | NZ_ACYS00000000 |                   |
| <i>A. baumannii</i> AB900               | NZ_ABXK00000000 |                   |
| <i>A. baumannii</i> AB_A118             | AEOW00000000    |                   |
| <i>A. baumannii</i> AB_ABNIH1           | AFSZ00000000    |                   |
| <i>A. baumannii</i> AB_ABNIH2           | AFTA00000000    |                   |
| <i>A. baumannii</i> AB_ABNIH3           | AFTB00000000    |                   |
| <i>A. baumannii</i> AB_ABNIH4           | AFTC00000000    |                   |
| <i>A. baumannii</i> AB_ACICU            | NC_010611.1     |                   |
| <i>A. baumannii</i> AB_ATCC_17978       | CP000521.1      |                   |
| <i>A. baumannii</i> AB_D1279779         | AERZ00000000    |                   |
| <i>A. baumannii</i> AB_MDR_TJ           | AEOE00000000    |                   |
| <i>A. baumannii</i> AB_MDR_ZJ06         | CP001937.1      |                   |
| <i>A. baumannii</i> AB_naval_18         | AFDA00000000    |                   |
| <i>A. baumannii</i> AB_naval_81         | AFDB00000000    |                   |
| <i>A. baumannii</i> AB_OIFC032          | AFCZ00000000    |                   |
| <i>A. baumannii</i> AB_TCDC_AB_715      | CP002522.1      |                   |
| <i>A. baumannii</i> AB_W6976            | AIEG00000000    |                   |
| <i>A. baumannii</i> AB_W7282            | AIEH00000000    |                   |
| <i>A. baumannii</i> AB_WM99C            | AERY00000000    |                   |
| <i>A. baumannii</i> ATCC_19606          | ACQB00000000    |                   |
| <i>A. baumannii</i> AYE                 | NC_010410.1     |                   |
| <i>A. baumannii</i> AB_NCTC_10304       | AIEE00000000    |                   |
| <i>A. baumannii</i> SDF                 | NC_010400.1     |                   |
| <i>A. baumannii</i> UMB001              | AEPK00000000    |                   |
| <i>A. baumannii</i> UMB002              | AEPL00000000    |                   |
| <i>A. baumannii</i> UMB003              | AEPM00000000    |                   |
