# Supplementary material
Source: PubMed Central journal article supplement (PMC3416384)
Supplement: supp_78.14.4884_AEM00929-12_TableS2.pdf [file supp_78.14.4884_AEM00929-12_TableS2.pdf]

**Table S2.** Performance of pubMLST and GIG markers for 42 *A. baumannii* genomes

| Marker       | System  | RF value | polymorphisms |
|--------------|---------|----------|---------------|
| GIG 1        | GIG     | 34       | 48            |
| GIG 2        | GIG     | 34       | 30            |
| GIG 3        | GIG     | 34       | 108           |
| <i>gyrB</i>  | pubMLST | 36       | 17            |
| <i>gpi</i>   | pubMLST | 36       | 80            |
| <i>rpoD</i>  | pubMLST | 36       | 5             |
| <i>gltA</i>  | pubMLST | 37       | 7             |
| <i>recA</i>  | pubMLST | 37       | 11            |
| <i>cpn60</i> | pubMLST | 38       | 7             |
| <i>gdhB</i>  | pubMLST | n/a*     | n/a*          |

\**gdhB* not conserved in *A. baumannii* SDF
